# Supplementary material for: Microwave-assisted hydrothermal synthesis of graphene-wrapped CuO hybrids for lithium ion batteries
Source: Royal Society of Chemistry journal article supplement (doi:10.1039/c4ra09144b), 2014-10-06
Supplement: c4ra09144b1.pdf [file c4ra09144b1.pdf]

## Electronic Supplementary Information

**XRD, TGA, SEM, TEM and BET surface area.** The samples was characterized by X-ray diffraction (XRD) employing a Bruker D8 Focus X-ray Diffraction with Cu K $\alpha$  radiation. TGA was carried out on a NETZSCH STA 449F3 simultaneous thermal analyzer in air with a heating rate of 10 °C min<sup>-1</sup>. The morphology and crystalline structure were characterized by SEM (Hitachi S-4800) and TEM (Tecnai G2) with an accelerating voltage of 200 kV. Brunauer-Emmett-Teller (BET) surface area was measured by nitrogen sorption using a Micromeritics ASAP 2020 analyzer.

**Electrochemical measurements.** The electrochemical properties were measured via CR2025 type half-cells. The working electrodes were prepared by mixing the active material, acetylene black and polyvinylidene fluoride (PVDF) with a weight ratio of 80:10:10. Li foil and Celgard 2400 membrane were used as counter electrode and separator, respectively. The electrolyte was 1M LiPF<sub>6</sub> dissolved in ethylene carbonate (EC) and dimethyl carbonate (DMC) with a volume ratio of 1:1. Galvanostatic charge-discharge measurements were performed in the voltage range between 0.01 and 3 V at room temperature by LAND CT2001A battery testing system. Electrochemical impedance spectroscopy (EIS) tests were performed on a VMP3 Electrochemical Workstation (Bio-logic Inc.) in the frequency range from 700 kHz to 100 mHz at room temperature.

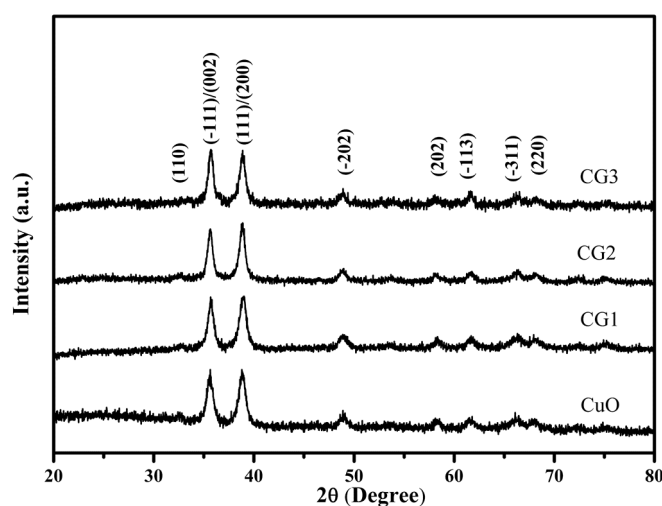

Fig. S1 XRD patterns of the obtained samples.

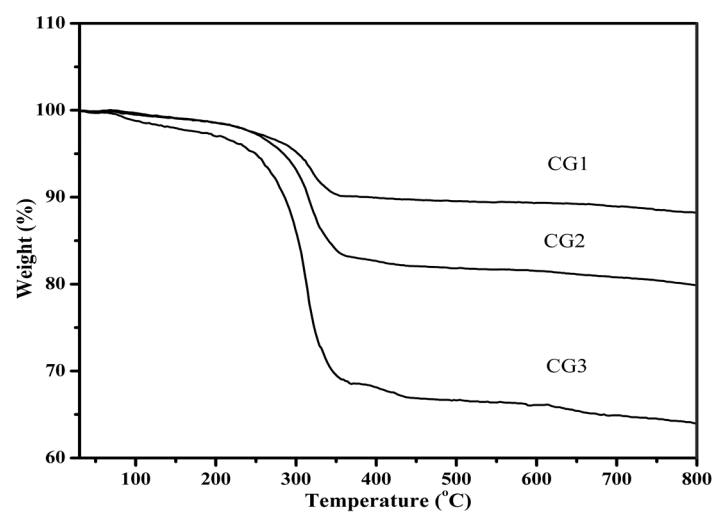

Fig. S2 TGA curves of the CuO-graphene hybrids.

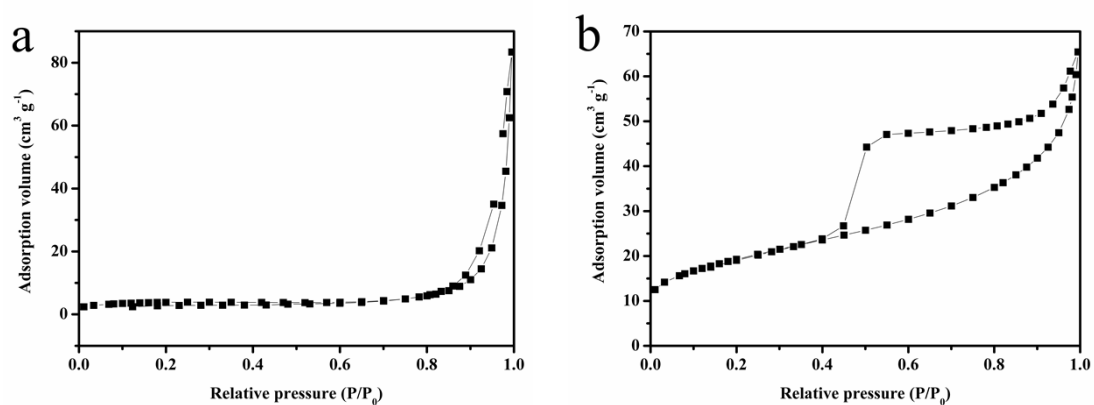

Fig. S3 Nitrogen sorption isotherms of (a) pristine CuO and (b) CG2.

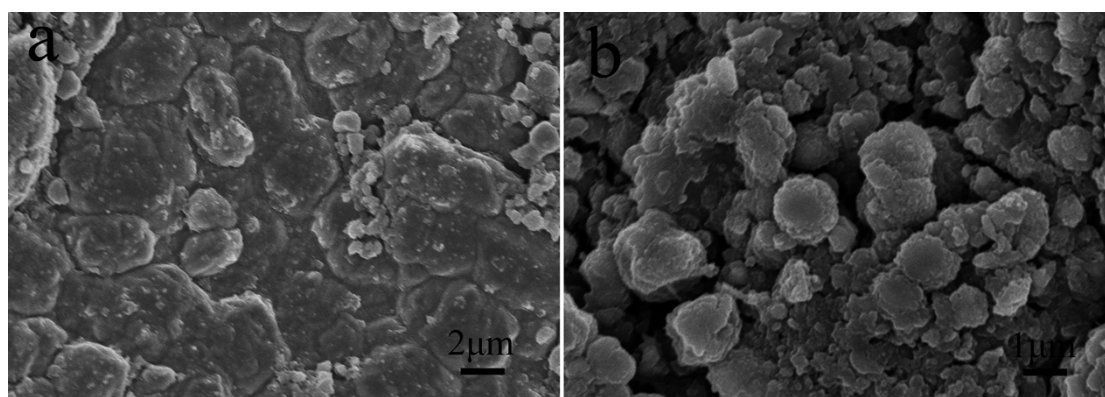

Fig. S4 SEM images of (a) pristine CuO and (b) CG2 electrodes after 120<sup>th</sup> cycling at  $0.2 \text{ A g}^{-1}$ .
